# Supplementary material for: Targeting Heat Shock Protein 27 and Fatty Acid Oxidation Augments Cisplatin Treatment in Cisplatin-Resistant Ovarian Cancer Cell Lines
Source: MDPI journal article supplement (doi:10.3390/ijms241612638), 2023-08-10
Supplement: s1 [file s1]

**Fig1C**

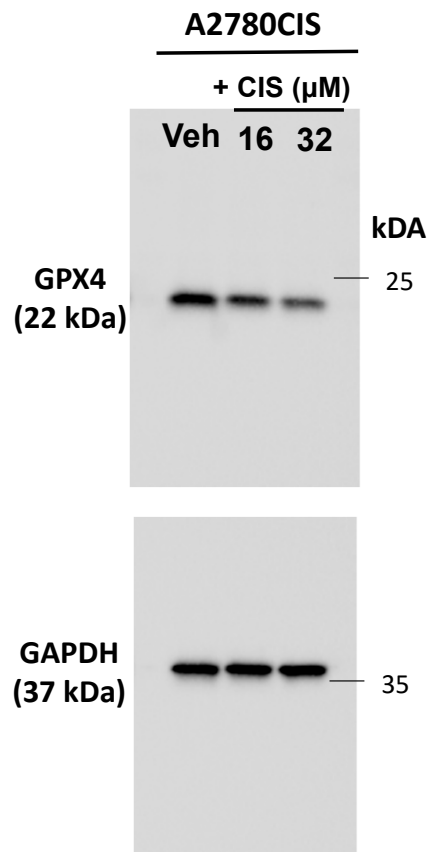

**FigS2A**

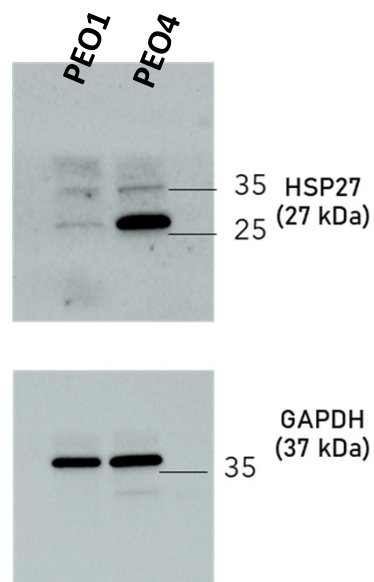

**FigS2B**

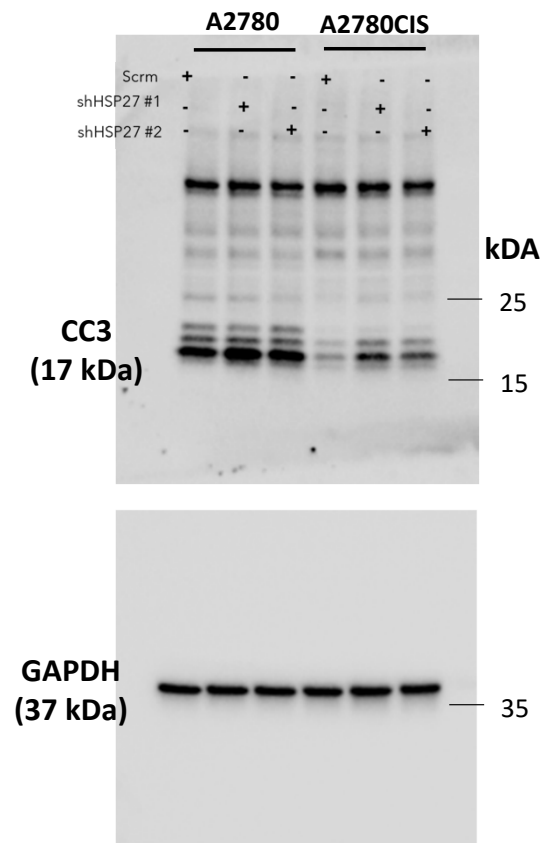

**Figure S12.** Uncropped western blot images for Fig1C, FigS2A, FigS2B

**FigS3A**

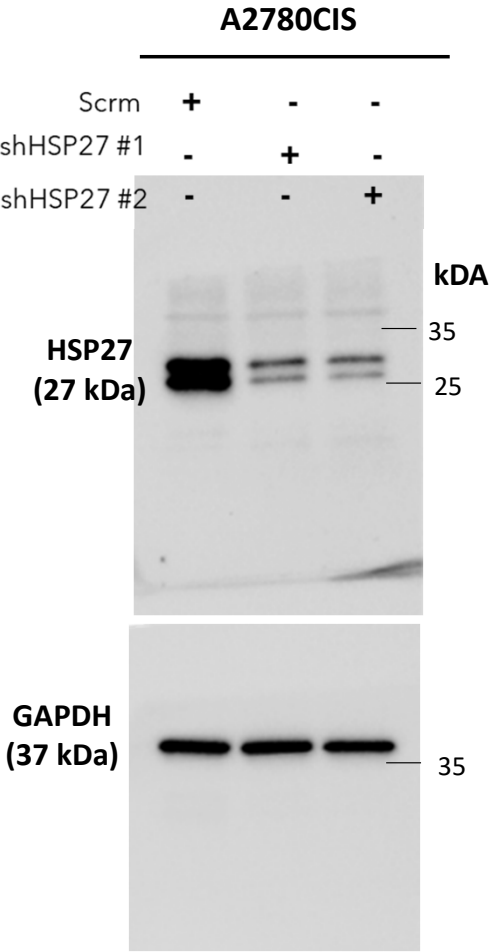

**FigS3B**

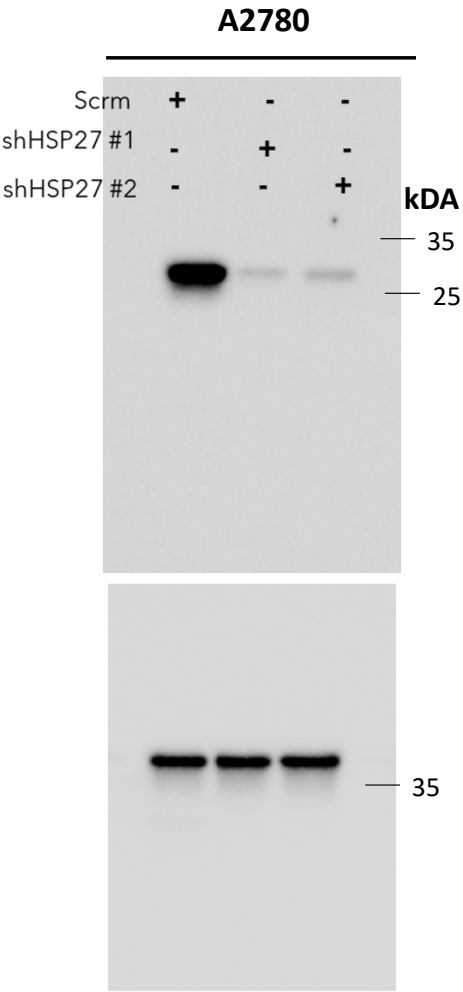

**FigS3C**

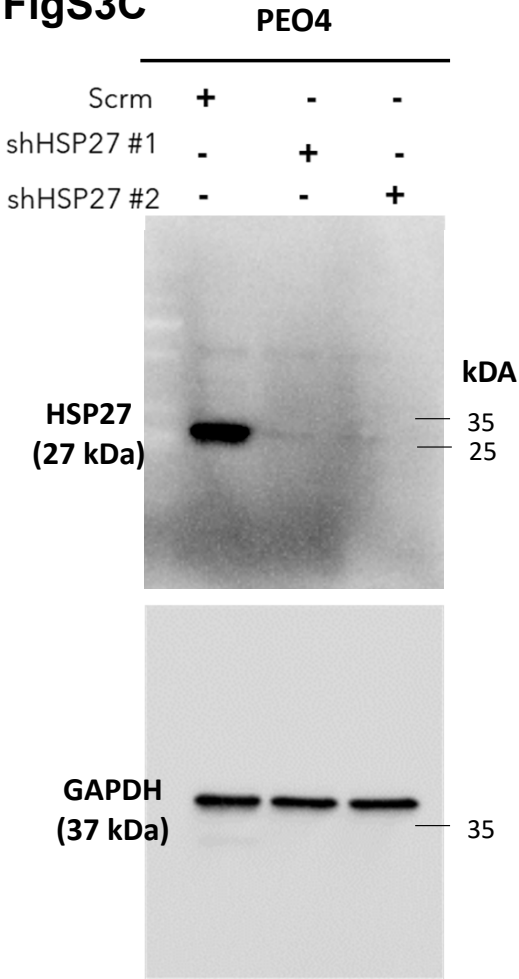

**Figure S13.** Uncropped western blot images FigS3A, FigS3B, FigS3C

**Fig2A**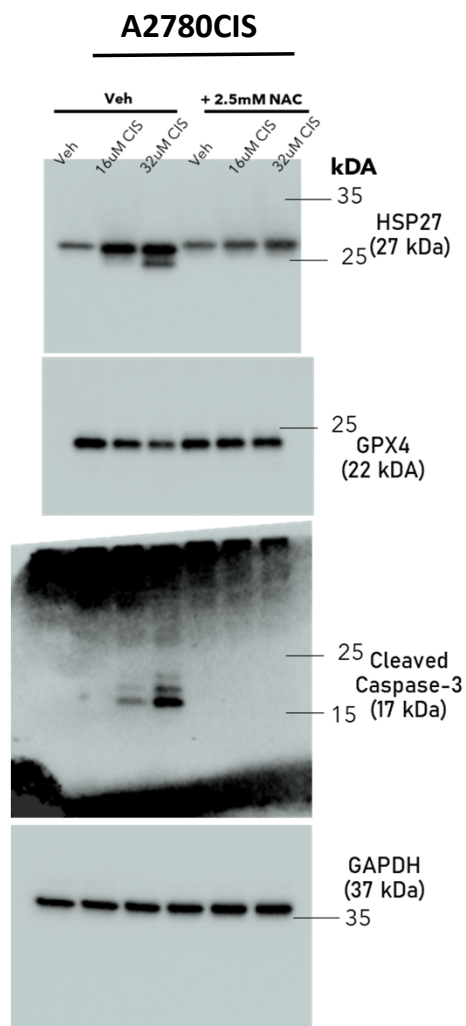**Fig2B**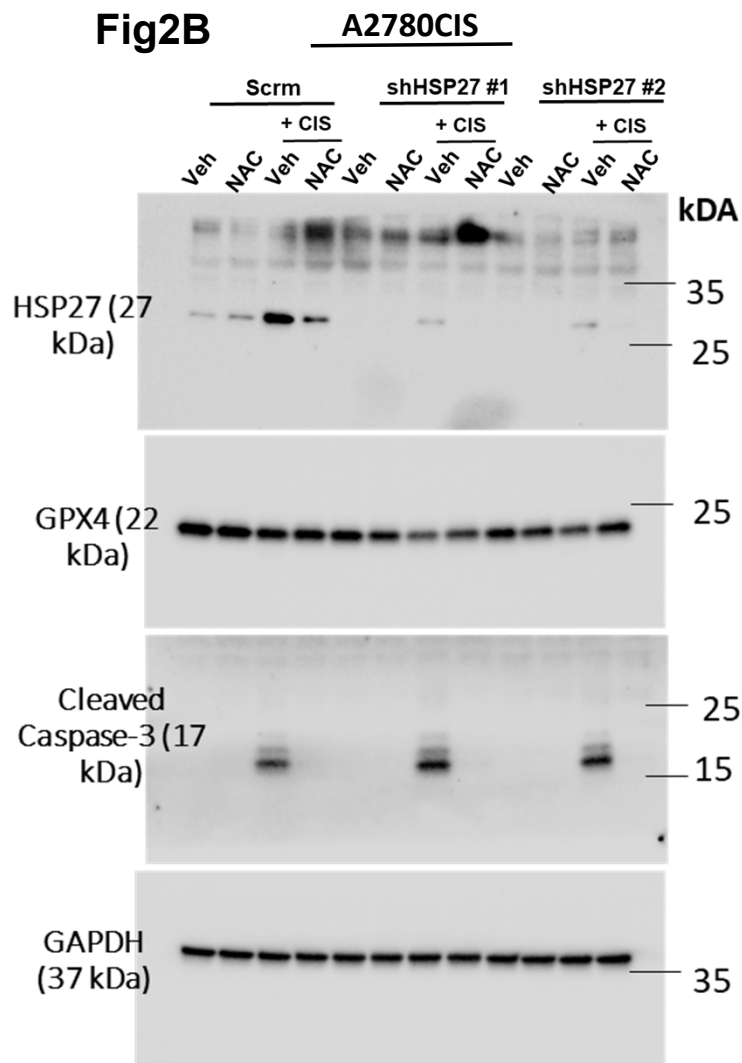**FigS6A**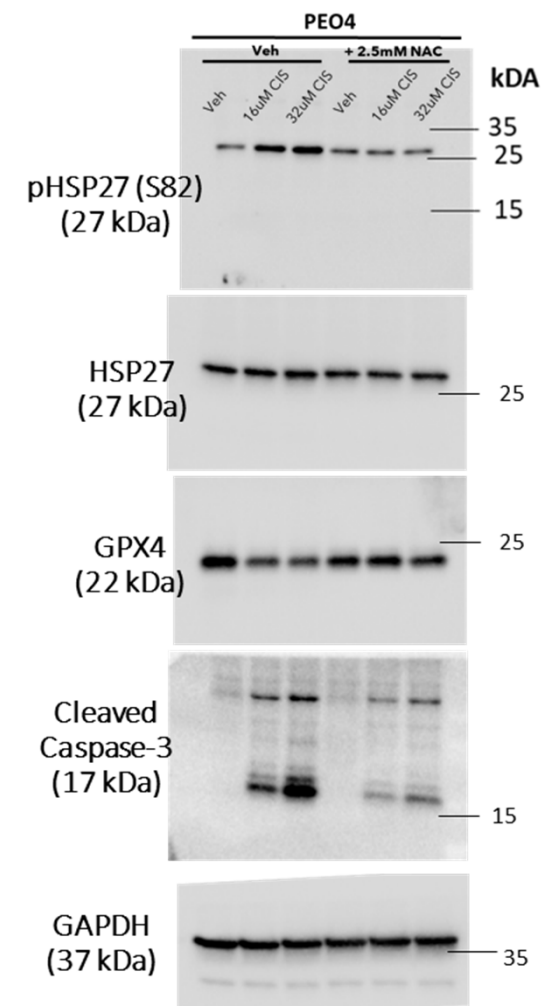**Figure S14.** Uncropped western blot images for Fig2A, Fig2B, FigS6A

**Fig3D**

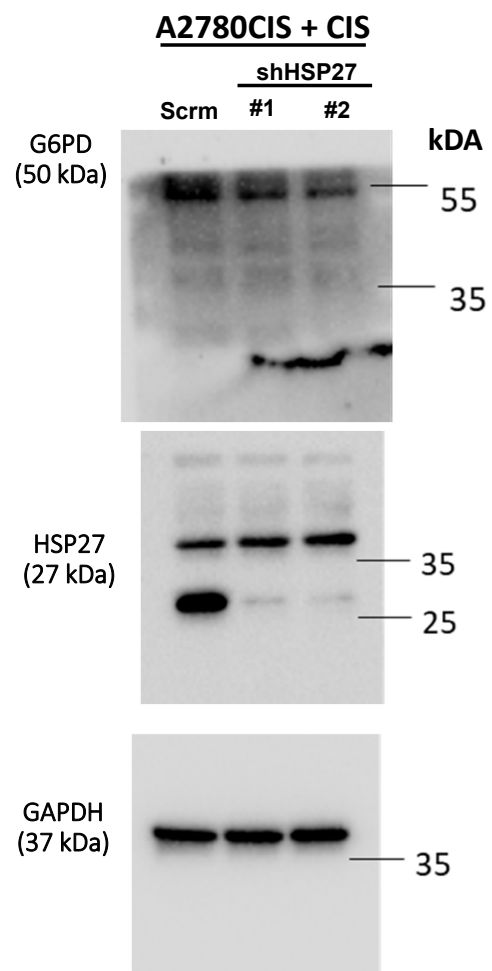

**Fig3E**

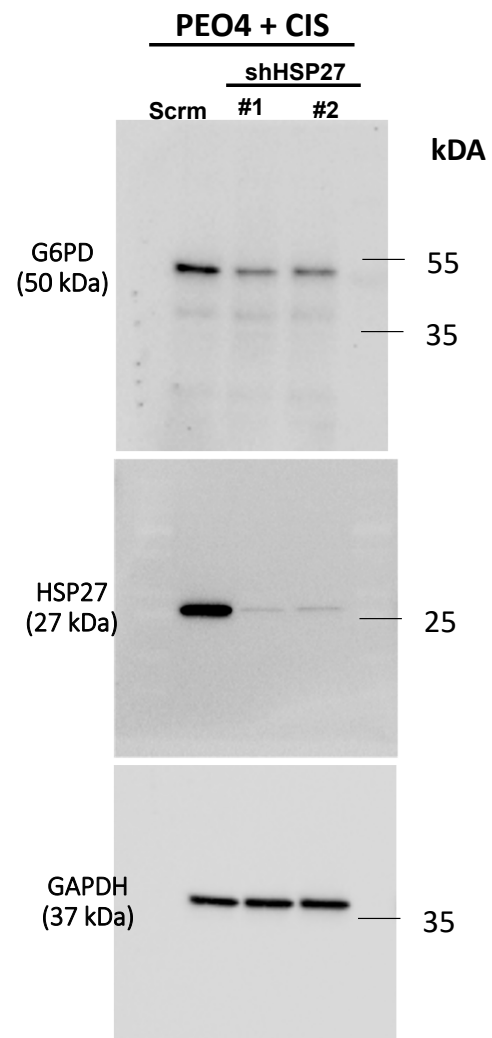

**Figure S15.** Uncropped western blot images for Fig3D, Fig3E

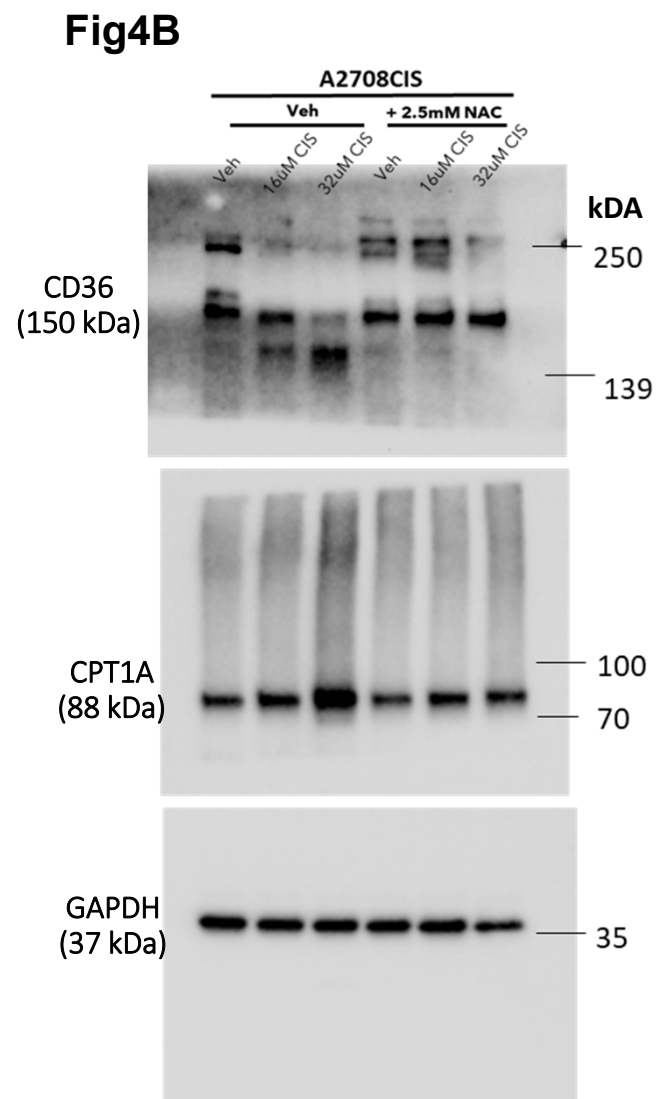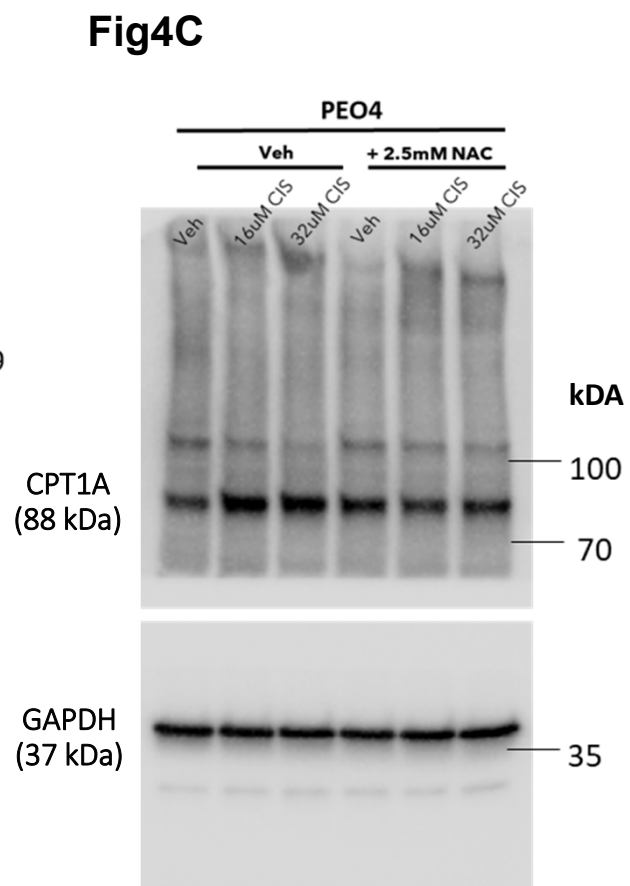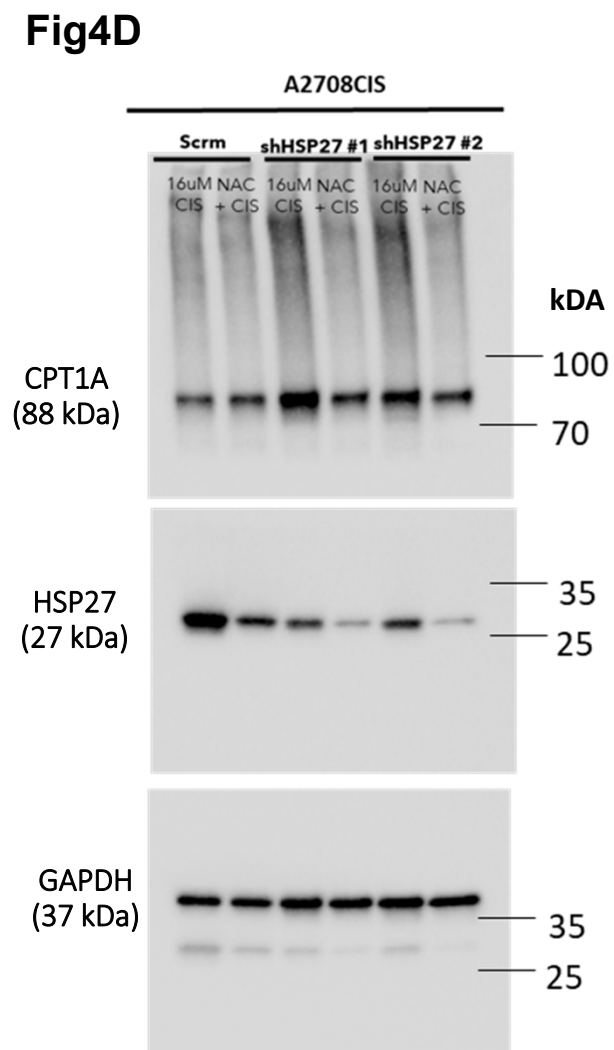

**Figure S16.** Uncropped western blot images for Fig4B, Fig4C, Fig4D

**Fig5E**

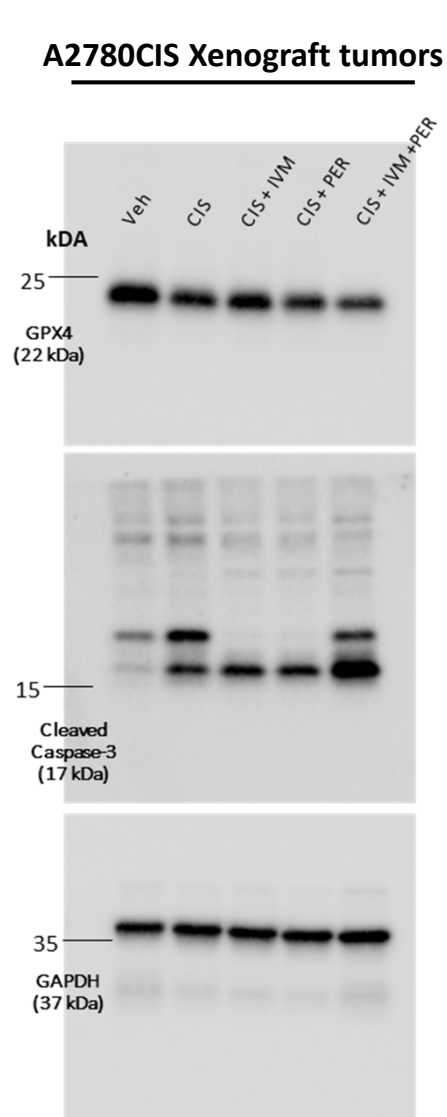

**Fig6A**

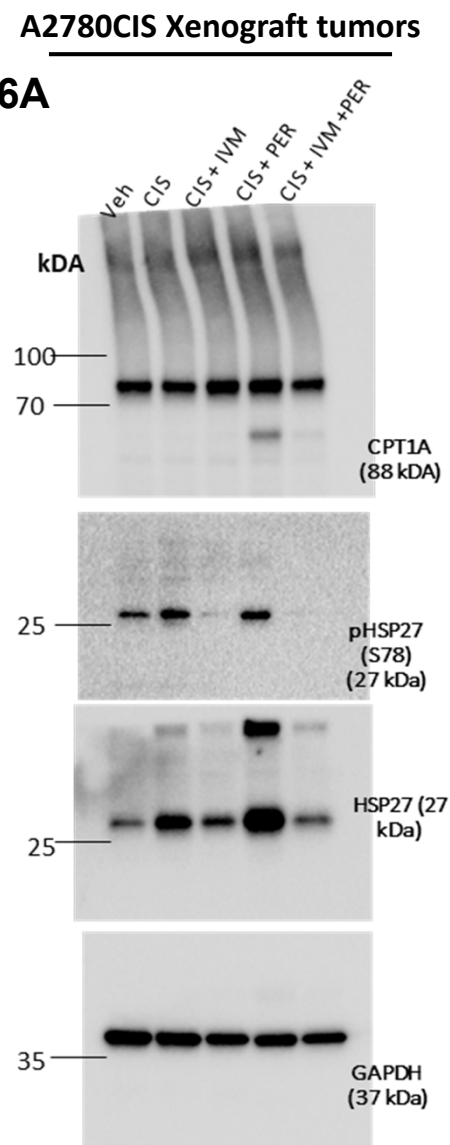

**FigS10A**

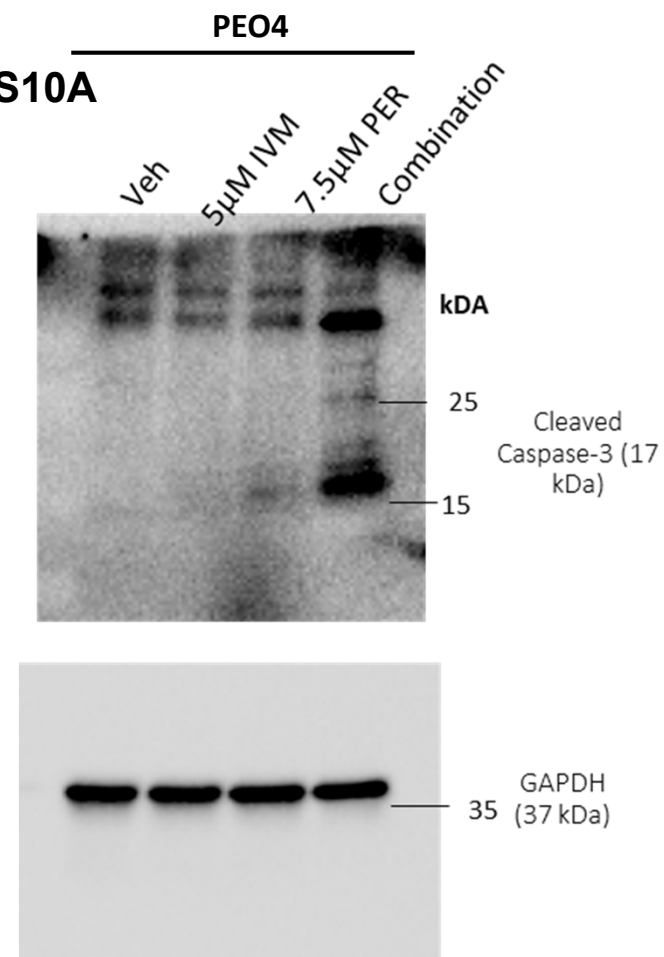

**Figure S17.** Uncropped western blot images for Fig5E, Fig6A, FigS10A
