# Supplementary material for: Targeting Heat Shock Protein 27 and Fatty Acid Oxidation Augments Cisplatin Treatment in Cisplatin-Resistant Ovarian Cancer Cell Lines
Source: MDPI journal article supplement (doi:10.3390/ijms241612638), 2023-08-10
Supplement: s1 [file s1]

**Table S2. List of antibodies, kit, and reagents**

| <b>Antibody, kit or reagent</b>                          | <b>Product #</b> | <b>Company</b>            |
|----------------------------------------------------------|------------------|---------------------------|
| Phospho-HSP27 (Ser78) antibody                           | #2405            | Cell Signaling Technology |
| Phospho-HSP27 (Ser82) antibody                           | #9709            | Cell Signaling Technology |
| HSP27 antibody (WB)                                      | #2402            | Cell Signaling Technology |
| HSP27 antibody (IF)                                      | #ab32501         | Abcam                     |
| Cleaved caspase-3 antibody                               | #9664P           | Cell Signaling Technology |
| GPX4 antibody                                            | #52455           | Cell Signaling Technology |
| G6PD antibody                                            | #12263           | Cell Signaling Technology |
| CPT1A antibody                                           | #ab128568        | Abcam                     |
| CD36 antibody                                            | #ab133625        | Abcam                     |
| GAPDH antibody                                           | #10R-G109a       | Fitzgerald                |
| Goat-anti rabbit secondary antibody, FITC-conjugated     | #31569           | Invitrogen                |
| Alexa Fluor 594 goat anti-rabbit Secondary antibody, IgG | #A11037          | Invitrogen                |
| DAPI                                                     | #62248           | Thermo Scientific         |
| Cisplatin                                                | #P4394           | Sigma Aldrich             |
| Ivermectin                                               | #I8898-25mg      | Sigma Aldrich             |
| N-Acetyl-L-cysteine                                      | #A9165           | Sigma Aldrich             |
| Perhexiline                                              | #SML0120-10MG    | Sigma Aldrich             |
| MitoSOX                                                  | #M36008          | Invitrogen                |

|                                 |           |            |
|---------------------------------|-----------|------------|
| CellROX                         | #C10444   | Invitrogen |
| ThiolTracker                    | #T10095   | Invitrogen |
| Image-iT Lipid peroxidation dye | #C10445-A | Invitrogen |
